# Supplementary material for: An interaction of heart disease-associated proteins POPDC1/2 with XIRP1 in transverse tubules and intercalated discs
Source: PubMed Central journal article supplement (PMC7709239; doi:10.1186/s12860-020-00329-3), 2020-12-01
Supplement: 12860_2020_329_MOESM2_ESM.pdf [file 12860_2020_329_MOESM2_ESM.pdf]

# An interaction of heart disease-associated proteins POPDC1/2 with XIRP1 in transverse tubules and intercalated discs

Ian Holt, Heidi R Fuller, Roland FR Schindler, Sally L Shirran, Thomas Brand and Glenn E Morris

## Additional File 2

### Original uncropped blots used for Figure 1:

Vertical black arrows show the lanes of these uncropped blots that were used to make up Figure 1. Non-adjacent lanes in the original blot that were juxtaposed in Figure 1 are shown separated by a black line in figure 1.

### Figure 1A original upper blot:

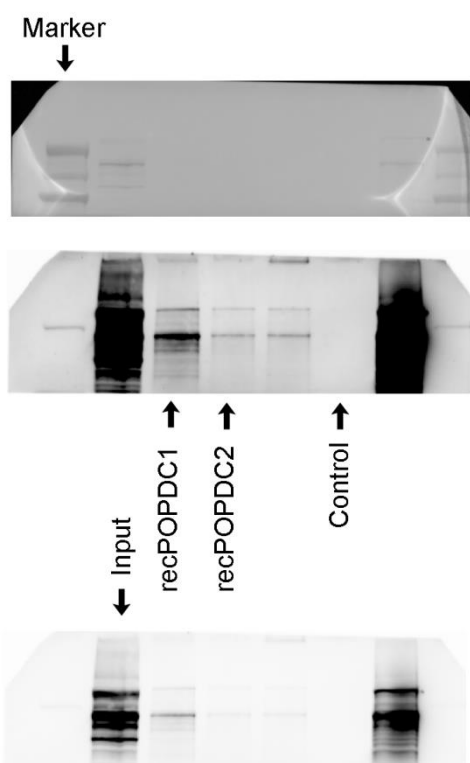

### Colourimetric image:

Molecular weight marker

### Chemiluminescent images (XIRP1):

Long exposure to show "recPOPDC1", "recPOPDC2" and "Control" lanes

Short exposure to show "Input" lane

**Figure 1A original lower blot:**

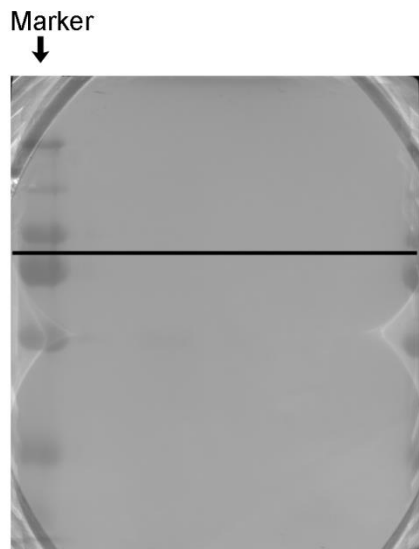

Image shown in Fig. 1A below the horizontal black line

**Colourimetric image:**  
Molecular weight marker

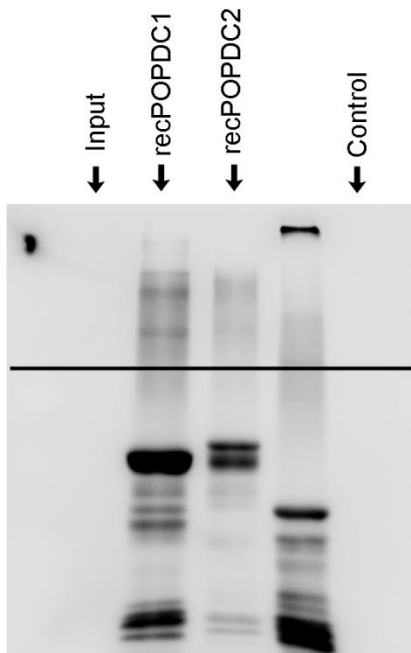

**Chemiluminescent image (GST):**  
“Input”, “recPOPDC1”, “recPOPDC2” and  
“Control” lanes

**Figure 1B original blot:**

Marker

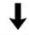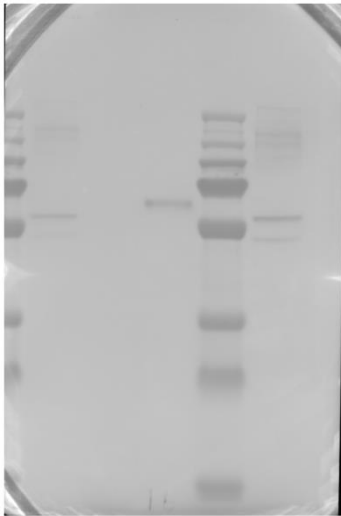

**Colourimetric image:**  
Molecular weight marker

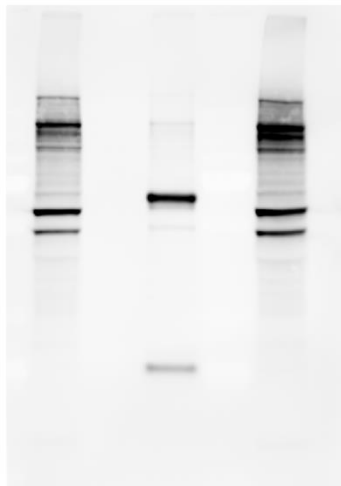

**Chemiluminescent images (XIRP1):**  
Short exposure to show "Input" and "Control" lanes

↑  
Input  
↑  
Control  
↓  
POPDC1 1C12

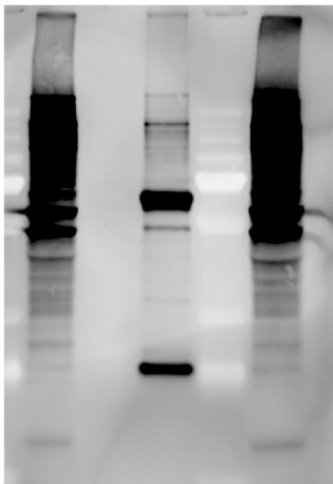

Long exposure to show "POPDC1 1C12" lane

Figure 1C original blot:

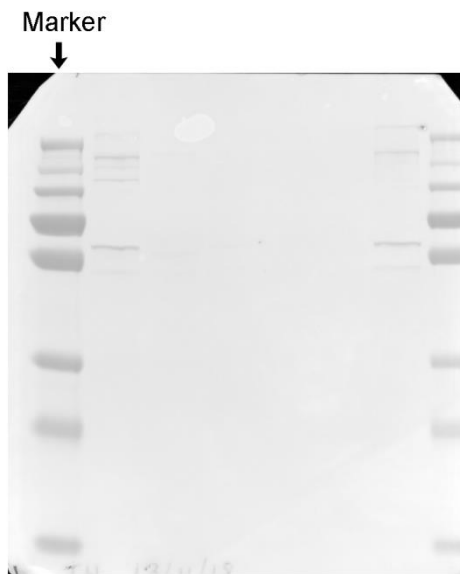

Colourimetric image:  
Molecular weight marker

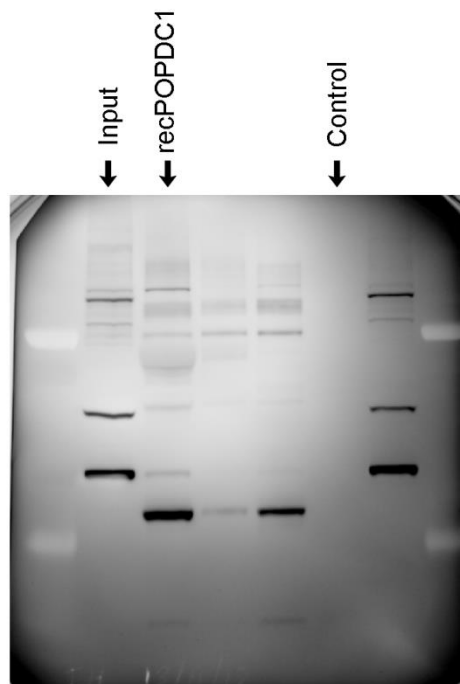

Chemiluminescent image (Annexin A5):  
"Input", "recPOPDC1" and "Control" lanes

**Figure 1D original blot:**

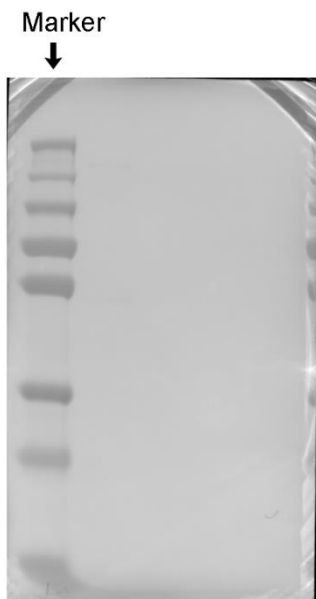

**Colourimetric image:**  
Molecular weight marker

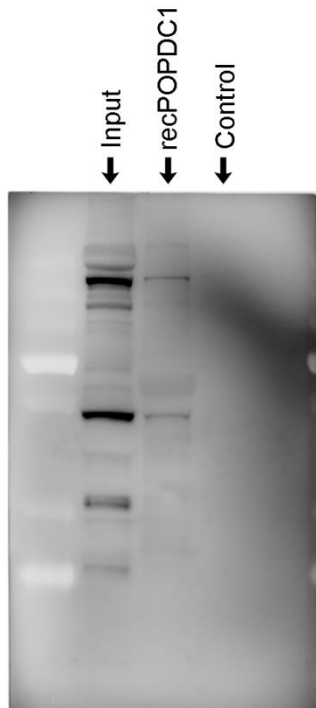

**Chemiluminescent images (XIRP1):**  
“Input”, “recPOPDC1” and “Control”  
lanes
